# Supplementary material for: Using expert knowledge to increase realism in environmental system models can dramatically reduce the need for calibration
Source: Copernicus journal article supplement (doi:10.5194/hess-18-4839-2014), 2014-12-05
Supplement: Supplementary file 1 [file hess-18-4839-2014-supplement.pdf]

Supplement of Hydrol. Earth Syst. Sci., 18, 4839–4859, 2014  
<http://www.hydrol-earth-syst-sci.net/18/4839/2014/>  
doi:10.5194/hess-18-4839-2014-supplement  
© Author(s) 2014. CC Attribution 3.0 License.

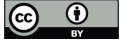

*Supplement of*

## **Using expert knowledge to increase realism in environmental system models can dramatically reduce the need for calibration**

**S. Gharari et al.**

*Correspondence to:* S. Gharari (s.gharari@tudelft.nl)

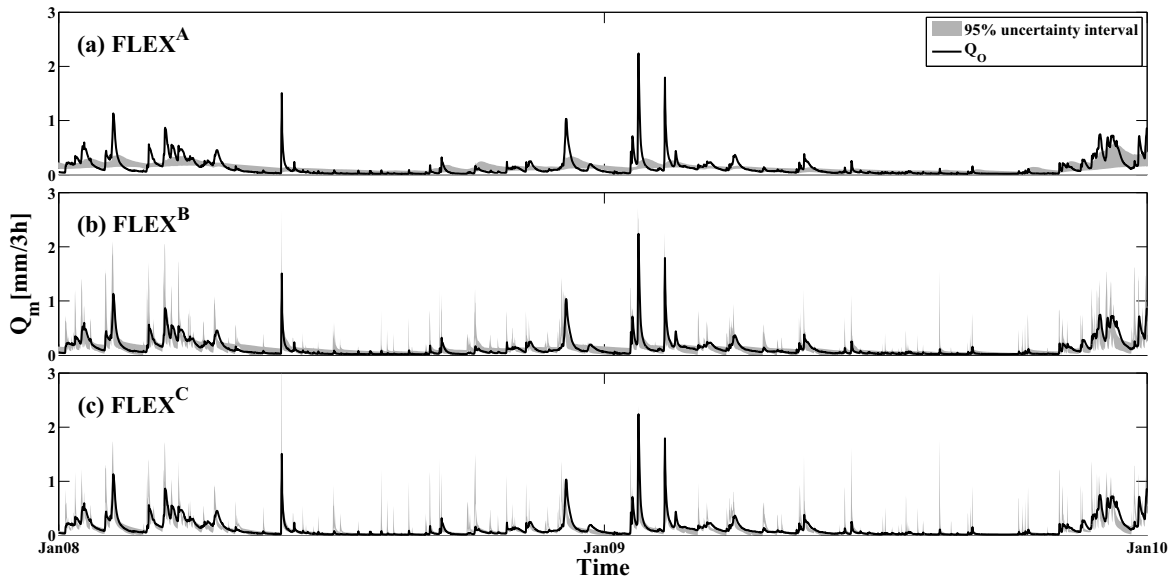

**Fig. 1.** The observed hydrograph and the 95% uncertainty interval of the modeled hydrograph derived from the complete set of *constrained but uncalibrated* parameter sets for the three different model set-ups (a) FLEX<sup>A</sup>, (b) FLEX<sup>B</sup> and (c) FLEX<sup>C</sup> for 2 years (2008-2009) of calibration.

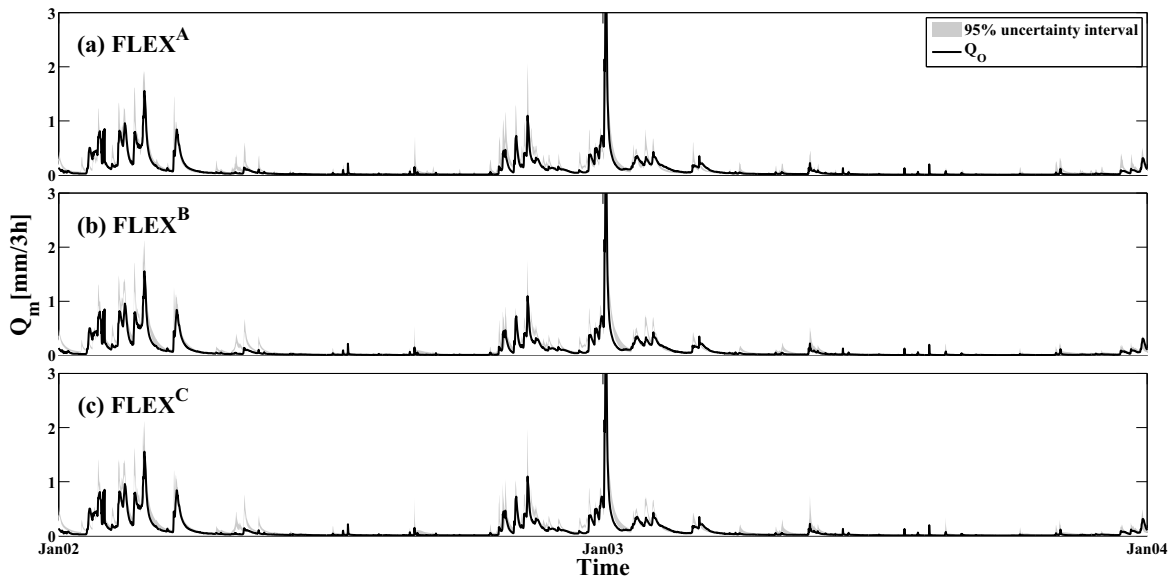

**Fig. 2.** The observed hydrograph and the 95% Pareto uncertainty interval of the modeled hydrograph for *constrained and calibrated* parameter sets for the three different model set-ups (a) FLEX<sup>A</sup>, (b) FLEX<sup>B</sup> and (c) FLEX<sup>C</sup> for the 2 years (2002–2003) of validation period.

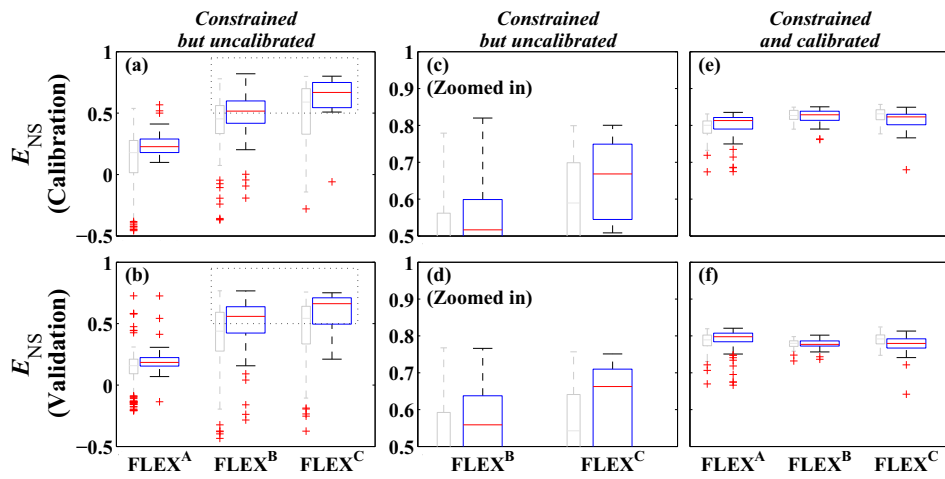

**Fig. 3.** Model performance ( $E_{NS}$ ) based on *constrained but uncalibrated* (a-d) and *constrained and calibrated* (e-f) parameter sets for calibration (2006–2009) and validation (2002–2005) periods for the three different model set-ups  $FLEX^A$ ,  $FLEX^B$  and  $FLEX^C$ . Note that (c) and (d) are zoom-ins of (a) and (b) and the gray box-plots represent the benchmark models. . The box plots indicate the median value in red and 25 and 75% quartile. Whiskers represent the 1.5 times the interquartile range (IQR) and the red crosses show outliers.

**Table 1.** The median model performances (in brackets their corresponding 95% uncertainty intervals) and the area spanned by the 95% uncertainty interval of hydrograph derived from uncalibrated parameter sets which satisfy the complete set of constraints for the three model set-ups FLEX<sup>A</sup>, FLEX<sup>B</sup> and FLEX<sup>C</sup>, for the three modeling objectives ( $E_{NS}$ ,  $E_{NS,\log}$ ,  $E_{NS,FDC}$ ) in the calibration (2006–2009) and validation (2002–2005) periods. The italic values indicate performance and 95% uncertainty interval of hydrograph for the unconstrained benchmark models.

|                   |             | $E_{NS}$                 | $E_{NS,\log}$            | $E_{NS,FDC}$             | 95 % uncertainty area [mm] |
|-------------------|-------------|--------------------------|--------------------------|--------------------------|----------------------------|
| FLEX <sup>A</sup> | Calibration | 0.23 [0.12 0.39]         | 0.29 [-0.02 0.59]        | 0.45 [0.28 0.76]         | 1243                       |
|                   |             | <i>0.18 [-0.37 0.39]</i> | <i>0.29 [-2.53 0.56]</i> | <i>0.38 [-0.35 0.76]</i> | 1888                       |
|                   | Validation  | 0.18 [0.09 0.29]         | 0.05 [-0.40 0.49]        | 0.39 [0.25 0.69]         | 1325                       |
|                   |             | <i>0.16 [-0.16 0.30]</i> | <i>0.10 [-1.11 0.51]</i> | <i>0.35 [-0.12 0.67]</i> | 1814                       |
| FLEX <sup>B</sup> | Calibration | 0.52 [-0.06 0.77]        | 0.45 [-1.15 0.73]        | 0.89 [0.62 0.99]         | 2042                       |
|                   |             | <i>0.45 [-1.44 0.76]</i> | <i>0.30 [-3.50 0.73]</i> | <i>0.81 [0.08 0.97]</i>  | 2993                       |
|                   | Validation  | 0.56 [0.00 0.73]         | 0.33 [-1.36 0.65]        | 0.87 [0.66 0.95]         | 1827                       |
|                   |             | <i>0.44 [-1.03 0.72]</i> | <i>0.07 [-3.06 0.60]</i> | <i>0.77 [0.05 0.93]</i>  | 2615                       |
| FLEX <sup>C</sup> | Calibration | 0.67 [-0.06 0.80]        | 0.50 [-0.33 0.74]        | 0.95 [0.88 0.99]         | 1294                       |
|                   |             | <i>0.59 [-0.11 0.79]</i> | <i>0.58 [-2.89 0.75]</i> | <i>0.93 [0.65 0.99]</i>  | 2287                       |
|                   | Validation  | 0.66 [0.22 0.75]         | 0.36 [-2.37 0.70]        | 0.93 [0.82 0.96]         | 1274                       |
|                   |             | <i>0.54 [-0.24 0.75]</i> | <i>0.34 [-2.30 0.69]</i> | <i>0.86 [0.60 0.94]</i>  | 2015                       |

**Table 2.** The median model performances (in brackets their corresponding Pareto uncertainty intervals) and the area spanned by the uncertainty interval of the hydrograph derived from the Pareto optimal solutions of the *constrained and calibrated* model set-ups FLEX<sup>A</sup>, FLEX<sup>B</sup> and FLEX<sup>C</sup> for the three modeling objectives ( $E_{NS}$ ,  $E_{NS,\log}$ ,  $E_{NS,FDC}$ ) in the calibration (2006–2009) and validation (2002–2005) periods. The italic values indicate performance and 95% uncertainty interval of hydrograph for the benchmark models (without any constraints).

|                   |             | $E_{NS}$                | $E_{NS,\log}$           | $E_{NS,FDC}$            | 95 % uncertainty area [mm] |
|-------------------|-------------|-------------------------|-------------------------|-------------------------|----------------------------|
| FLEX <sup>A</sup> | Calibration | 0.81 [0.69 0.83]        | 0.84 [0.72 0.88]        | 0.98 [0.92 1.00]        | 661                        |
|                   |             | <i>0.80 [0.72 0.83]</i> | <i>0.84 [0.74 0.88]</i> | <i>0.99 [0.92 0.99]</i> | 683                        |
|                   | Validation  | 0.80 [0.68 0.82]        | 0.76 [0.63 0.80]        | 0.93 [0.90 0.95]        | 574                        |
|                   |             | <i>0.79 [0.71 0.82]</i> | <i>0.75 [0.65 0.80]</i> | <i>0.93 [0.89 0.95]</i> | 593                        |
| FLEX <sup>B</sup> | Calibration | 0.83 [0.76 0.85]        | 0.83 [0.59 0.86]        | 0.99 [0.98 1.00]        | 600                        |
|                   |             | <i>0.83 [0.79 0.85]</i> | <i>0.84 [0.62 0.87]</i> | <i>0.99 [0.98 1.00]</i> | 561                        |
|                   | Validation  | 0.78 [0.74 0.80]        | 0.70 [0.48 0.79]        | 0.92 [0.90 0.93]        | 526                        |
|                   |             | <i>0.78 [0.75 0.80]</i> | <i>0.71 [0.48 0.79]</i> | <i>0.92 [0.89 0.93]</i> | 489                        |
| FLEX <sup>C</sup> | Calibration | 0.82 [0.73 0.85]        | 0.83 [0.59 0.88]        | 0.99 [0.97 1.00]        | 709                        |
|                   |             | <i>0.83 [0.78 0.85]</i> | <i>0.84 [0.64 0.88]</i> | <i>0.99 [0.98 1.00]</i> | 621                        |
|                   | Validation  | 0.78 [0.69 0.81]        | 0.70 [0.47 0.78]        | 0.92 [0.88 0.94]        | 570                        |
|                   |             | <i>0.79 [0.76 0.82]</i> | <i>0.73 [0.51 0.80]</i> | <i>0.92 [0.90 0.94]</i> | 535                        |
